# Supplementary material for: Influence of silica nanoparticles on mass transfer in a membrane-based micro-contactor
Source: Royal Society of Chemistry journal article supplement (doi:10.1039/c5ra26056f), 2016-01-01
Supplement: c5ra26056f1.pdf [file c5ra26056f1.pdf]

Table- Conditions of experimental data of Fig. 10 (for base fluid and nanofluid, the numbers 1 to 7 respectively show the conditions of experimental data from the left to the right of Fig. 10.)

| Base fluid             | Q <sub>org</sub> (ml/min) | Q <sub>aq</sub> (ml/min) | Relative error between calculated and experimental overall mass transfer coefficient (%) |
|------------------------|---------------------------|--------------------------|------------------------------------------------------------------------------------------|
| 1                      | 0.22                      | 0.13                     | 4.7                                                                                      |
| 2                      | 0.07                      | 0.22                     | -5.62                                                                                    |
| 3                      | 0.11                      | 0.22                     | -5.02                                                                                    |
| 4                      | 0.22                      | 0.22                     | -5.64                                                                                    |
| 5                      | 0.36                      | 0.22                     | -13.77                                                                                   |
| 6                      | 0.22                      | 0.44                     | -14.76                                                                                   |
| 7                      | 0.22                      | 0.66                     | -30.76                                                                                   |
| Nanofluid (0.001 vol%) |                           |                          |                                                                                          |
| 1                      | 0.07                      | 0.22                     | -12.97                                                                                   |
| 2                      | 0.11                      | 0.22                     | -7.08                                                                                    |
| 3                      | 0.22                      | 0.13                     | -8.75                                                                                    |
| 4                      | 0.36                      | 0.22                     | -0.26                                                                                    |
| 5                      | 0.22                      | 0.22                     | -7.41                                                                                    |
| 6                      | 0.22                      | 0.66                     | -2.73                                                                                    |
| 7                      | 0.22                      | 0.44                     | -8.44                                                                                    |
| Nanofluid (0.01 vol%)  |                           |                          |                                                                                          |
| 1                      | 0.07                      | 0.22                     | 1.90                                                                                     |
| 2                      | 0.11                      | 0.22                     | 0.97                                                                                     |
| 3                      | 0.22                      | 0.13                     | 5.75                                                                                     |
| 4                      | 0.36                      | 0.22                     | 5.80                                                                                     |
| 5                      | 0.22                      | 0.66                     | 4.98                                                                                     |
| 6                      | 0.22                      | 0.44                     | 1.26                                                                                     |
| 7                      | 0.22                      | 0.22                     | -4.73                                                                                    |
| Nanofluid (0.1 vol%)   |                           |                          |                                                                                          |
| 1                      | 0.07                      | 0.22                     | 9.14                                                                                     |
| 2                      | 0.11                      | 0.22                     | 8.13                                                                                     |
| 3                      | 0.22                      | 0.13                     | 0.32                                                                                     |
| 4                      | 0.36                      | 0.22                     | 7.33                                                                                     |
| 5                      | 0.22                      | 0.22                     | 0.69                                                                                     |
| 6                      | 0.22                      | 0.66                     | 6.42                                                                                     |
| 7                      | 0.22                      | 0.44                     | 3.04                                                                                     |
